# Supplementary material for: Phosphorylated EGFR and PI3K/Akt signaling kinases are expressed in circulating tumor cells of breast cancer patients
Source: Springer Nature journal article supplement (doi:10.1186/bcr2149), 2008-09-29
Supplement: Additional file 1 [file bcr2149-s1.doc]

**Supplementary Table 1 .** EGFR, HER2, pEGFR, pAkt and pPI-3K expression in CTCs of breast cancer patients

|  | **Adjuvant** | **Metastatic** |
| --- | --- | --- |
| **CK positive** | 16 (100%) | 16 (100%) |
| **EGFR positive** | 6 (38%) | 7 (44%) |
| **pEGFR positive** | 2 (13%) | 6 (38%) |
| **HER2 positive** | 8 (50%) | 10 (63%) |
| **pPI-3K positive** | 14 (88%) | 14 (88%) |
| **pAkt positive** | 13 (81%) | 13 (81%) |
